# Supplementary material for: TTGNet-AMD: Android malware detection based on multi-modal feature fusion
Source: PeerJ journal article supplement (doi:10.7717/peerj-cs.3412), 2025-12-03
Supplement: Table_s1_Summary_of_prior_studies.docx [file Table_s1_Summary_of_prior_studies.docx]

| **Models** | **Datasets** | **Features** | **Feature representation** | **ACC** |
| --- | --- | --- | --- | --- |
| MimgNN[16] | Aliyun | API instruction | greyscale image | 98.66% |
| B2IMG[17] | CICMalDroid2020 | Dalvik bytecode | greyscale and RGB images | 98.7% |
| TextCNN[18] | AndroZoo | system APIs, third-party APIs | Text Semantic | 98.045% |
| Rashid[19] | Drebin, AndroZoo | Android permissions, intents, and API calls | Text Semantic | 98.2% |
| SIGDroid[20] | Drebin | Function Call Graph | Graph embedding | 99.51% |
| SeGDroid[7] | CICMalDroid2020, MalRadar | Function Call Graph | Graph embedding | 98.37% |
| SFCGDroid[22] | CICMalDroid2020 | Function Call Graph | Graph embedding | 97.67% |
