# Supplementary material for: TTGNet-AMD: Android malware detection based on multi-modal feature fusion
Source: PeerJ journal article supplement (doi:10.7717/peerj-cs.3412), 2025-12-03
Supplement: Table_s2_Sensitive_API_list.docx [file Table_s2_Sensitive_API_list.docx]

Table s2 Sensitive API list

| **Categories** | **Packages containing sensitive apis** | **Number of apis** |
| --- | --- | --- |
| Data encryption and decryption | javax.crypto.Cipher java.security.SecureRandom | 42 |
| On the phone | android.telephony.TelephonyManager android.telephony.PhoneStateListener | 19 |
| Geographical location | android.location.LocationManager android.location.Location | 16 |
| File reading and writing | android.app.SharedPreferencesImpl | 38 |
| Text message | android.telephony.SmsManager  android.telephony.gsm.SmsMansager android.telephony.SmsMessage | 15 |
| Network data transmission | org.apache.http.impl.client.DefaultHttpClient org.apache.http.client.HttpClient java.net.URLConnection java.net.HttpURLConnection java.net.URL java.net.Socket sun.net.www.protocol.http.HttpURLConnection | 29 |
| Managing user accounts | android.accounts.AccountManager | 12 |
| Google client fetches the credentials | com.google.auth.oauth2.DefaultCredentialsProvider  com.google.auth.oauth2.UserAuthorizer com.google.common.io.MultiInputStream com.google.android.mms.pdu.PduPersister | 27 |
