# Supplementary material for: TTGNet-AMD: Android malware detection based on multi-modal feature fusion
Source: PeerJ journal article supplement (doi:10.7717/peerj-cs.3412), 2025-12-03
Supplement: Table_s3_Function_call_graph_features.docx [file Table_s3_Function_call_graph_features.docx]

| **Types** | **Before optimization** | | **After optimization** | | **Average optimization rate (%)** |
| --- | --- | --- | --- | --- | --- |
| **Average number of edges** | **Average number of nodes** | **Average number of edges** | **Average number of nodes** |
| Benign | 181615 | 47995 | 20242 | 5382 | 89% |
| Adware | 68653 | 17721 | 7813 | 2019 | 89% |
| SMS | 8861 | 2342 | 1057 | 282 | 88% |
| Banking | 32134 | 9309 | 3601 | 1015 | 89% |
| Riskware | 22116 | 6719 | 2459 | 746 | 89% |
