# Supplementary material for: TTGNet-AMD: Android malware detection based on multi-modal feature fusion
Source: PeerJ journal article supplement (doi:10.7717/peerj-cs.3412), 2025-12-03
Supplement: Table_s4_Core_instruction_set.docx [file Table_s4_Core_instruction_set.docx]

| **Start of instruction** | **Description** | **Related instructions** | **Number** |
| --- | --- | --- | --- |
| M | Data movement and flow control | move;move/from16;move-wide;move-wide/from16;move-wide/16;move-object;move-object/from16;move-result;move-result-wide;move-result-object;move-exception | 13 |
| R | Return operation | return;return-void;return-wide;return-object | 4 |
| G | Jump operation | goto;goto/16;goto/32 | 3 |
| I | The conditional jump operation is satisfied | if-eq;if-ne;if-lt;if-gt;if-le;if-eqz;if-nez;if-ltz;if-gez;if-gtz;if-lez | 12 |
| T | Extracting data | aget;aget-wide;aget-object;aget-boolean;aget-byte;aget-char;aget-short;iget;iget-wide;iget-object;iget-boolean;iget-byte;iget-char;iget-short;sget;sget-wide;sget-object;sget-boolean;sget-byte;sget-char;sget-short | 21 |
| P | Storing data | aput;aput-wide;aput-object;aput-boolean;aput-byte;aput-char;aput-short;input;input-wide;input-object;input-boolean;input-byte;input-char;input-short;sput;sput-wide;sput-object;sput-boolean;sput-byte;sput-byte;sput-char;sput-short | 21 |
| V | Calling a method | invoke-virtual;invoke-super;invoke-direct;invoke-static;invoke-interface;invoke-virtual/range;invoke-super/range;invoke-direct/range;invoke-static/range;invoke-interface/range;invoke-custom;invoke-polymorphic;invoke-virtual/range/range;invoke-super/range/range;invoke-direct/range/range | 15 |
