# Supplementary material for: TTGNet-AMD: Android malware detection based on multi-modal feature fusion
Source: PeerJ journal article supplement (doi:10.7717/peerj-cs.3412), 2025-12-03
Supplement: Table_s5_Common_evaluation_indicators.docx [file Table_s5_Common_evaluation_indicators.docx]

| **Index Name** | **Notes** |
| --- | --- |
| True Positive (TP) | The number of malware samples correctly classified as malware. |
| False Positive (FP) | The number of software misclassified as malware that is correctly benign software across all samples. |
| True Negative (TN) | The number of benign software samples that were correctly classified as benign software among all the samples. |
| False Negative (FN) | The number of samples that were actually classified as malware incorrectly as benign software. |
